# Supplementary material for: Thermosensitive Drug Delivery System SBA-15-PEI for Controlled Release of Nonsteroidal Anti-Inflammatory Drug Diclofenac Sodium Salt: A Comparative Study
Source: MDPI journal article supplement (doi:10.3390/ma14081880), 2021-04-09
Supplement: s1 [file s1]

# Thermosensitive Drug Delivery System SBA-15-PEI for Controlled Release of Nonsteroidal Anti-inflammatory Drug Diclofenac Sodium Salt: A Comparative Study

Lubos Zauska <sup>1</sup>, Stefan Bova <sup>2</sup>, Eva Benova <sup>1</sup>, Jozef Bednarcik <sup>3</sup>, Matej Balaz <sup>4</sup>, Vladimir Zelenak <sup>1</sup>, Virginie Hornebecq <sup>5</sup> and Miroslav Almasi <sup>1,\*</sup>

<sup>1</sup> Department of Inorganic Chemistry, Faculty of Science, P. J. Šafárik University, Moyzesova 11, SK-041 01 Košice, Slovakia; lubos.zauska@student.upjs.sk (L.Z.); evapopjakova@gmail.com (E.B.); vladimir.zelenak@upjs.sk (V.Z.)

<sup>2</sup> BovaChem s.r.o, Garbiarska 1919/14, SK-048 01, Rožňava, Slovakia; stefan.bova@gmail.com

<sup>3</sup> Institute of Experimental Physics, Slovak Academy of Sciences, Watsonova 47, SK-040 01 Košice, Slovakia; jozef.bednarcik@upjs.sk

<sup>4</sup> Institute of Geotechnics, Slovak Academy of Sciences, Watsonova 45, SK-040 01 Košice, Slovakia; balazm@saske.sk

<sup>5</sup> Aix-Marseille University, CNRS, MADIREL, F-133 97 Marseille, France; virginie.hornebecq@univ-amu.fr

\* Correspondence: miroslav.almasi@upjs.sk; Tel.: +421 552-342-366

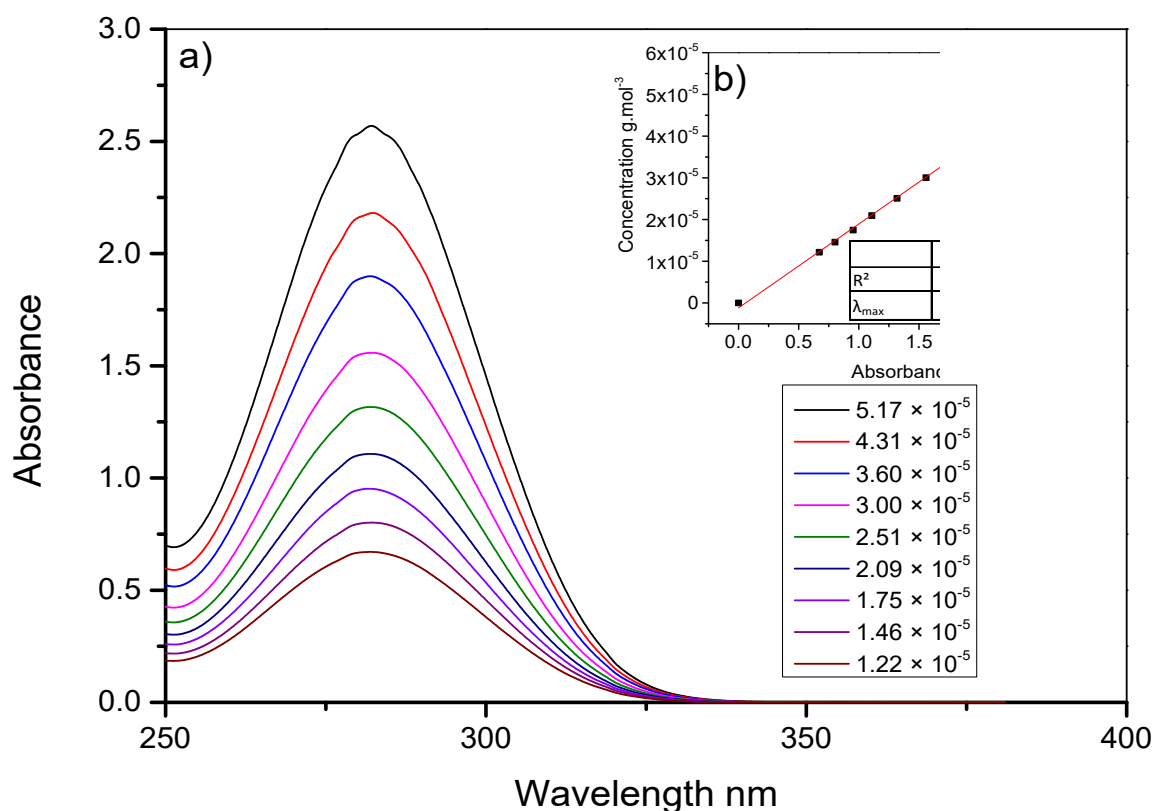

Figure S1. (a) UV spectra of diclofenac sodium methanolic solutions and (b) corresponding calibration curve.

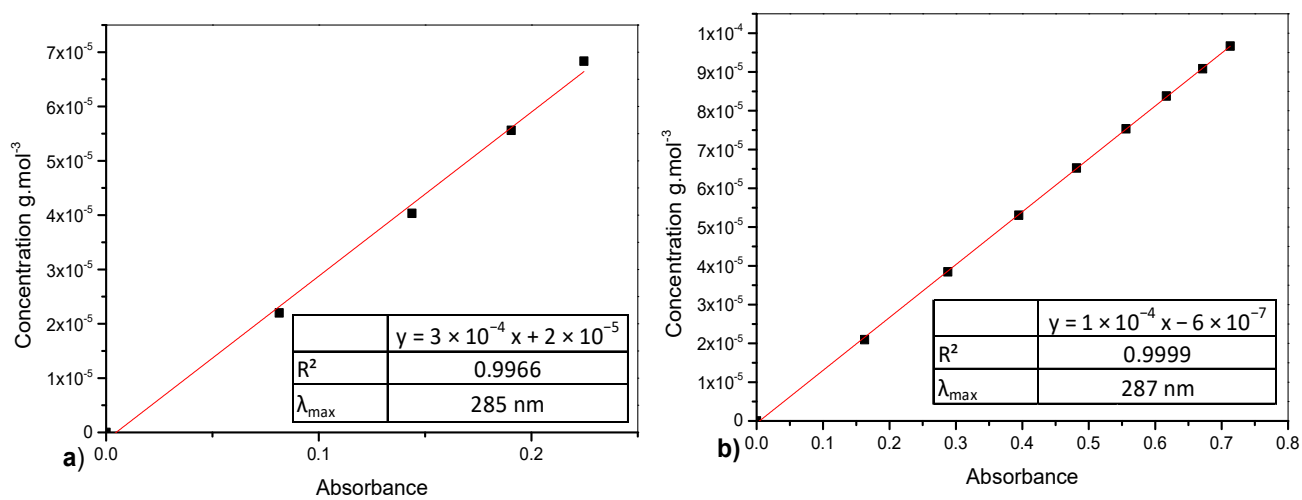

Figure S2. Calibration curve of diclofenac sodium in saline solutions at (a) pH = 2 and (b) pH = 7.4.

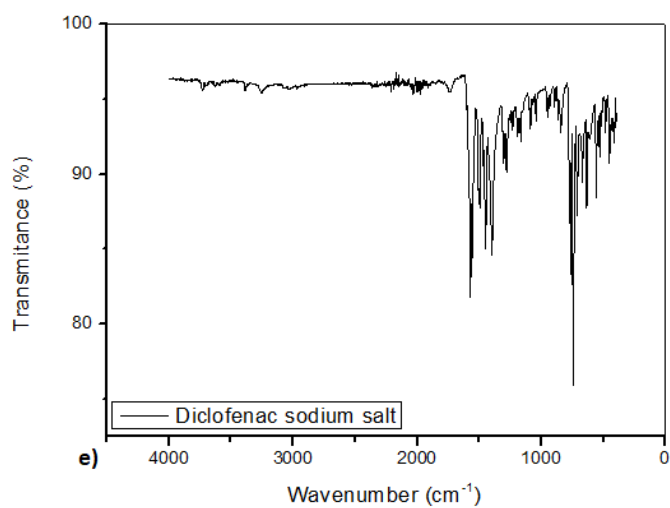

Figure S3. IR spectrum of diclofenac sodium salt.

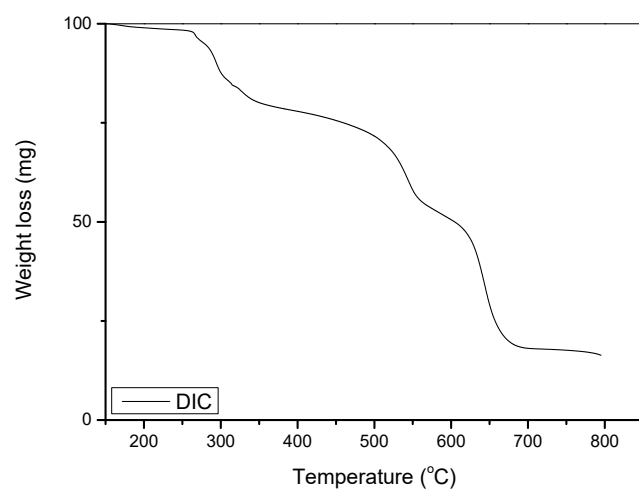

**Figure S4.** Thermogravimetric curve of diclofenac sodium salt.
